# Supplementary material for: Elucidation of the high CO2 reduction selectivity of isolated Rh supported on TiO2: a DFT study
Source: Royal Society of Chemistry journal article supplement (doi:10.1039/c5cy02158h), 2016-01-01
Supplement: c5cy02158h1.pdf [file c5cy02158h1.pdf]

## Supporting Information

### **Elucidation of the high CO<sub>2</sub> reduction selectivity by isolated Rh supported on TiO<sub>2</sub>: a DFT study**

Sicong Ma,<sup>†,1</sup> Weiyu Song,<sup>†,1</sup> Bing Liu,<sup>1</sup> Huiling Zheng,<sup>1</sup> Jianlin Deng,<sup>1</sup> Wenjia Zhong,<sup>1</sup> Jian Liu,<sup>1</sup>  
Xue-Qing Gong,<sup>2</sup> Zhen Zhao<sup>1,\*</sup>

<sup>1</sup> *State Key Laboratory of Heavy Oil Processing, College of Science, China University of Petroleum-Beijing, Beijing, 102249, P. R. China*

<sup>2</sup> *Key Laboratory for Advanced Materials, Centre for Computational Chemistry and Research Institute of Industrial Catalysis, East China University of Science and Technology, Shanghai, 200237, P. R. China*

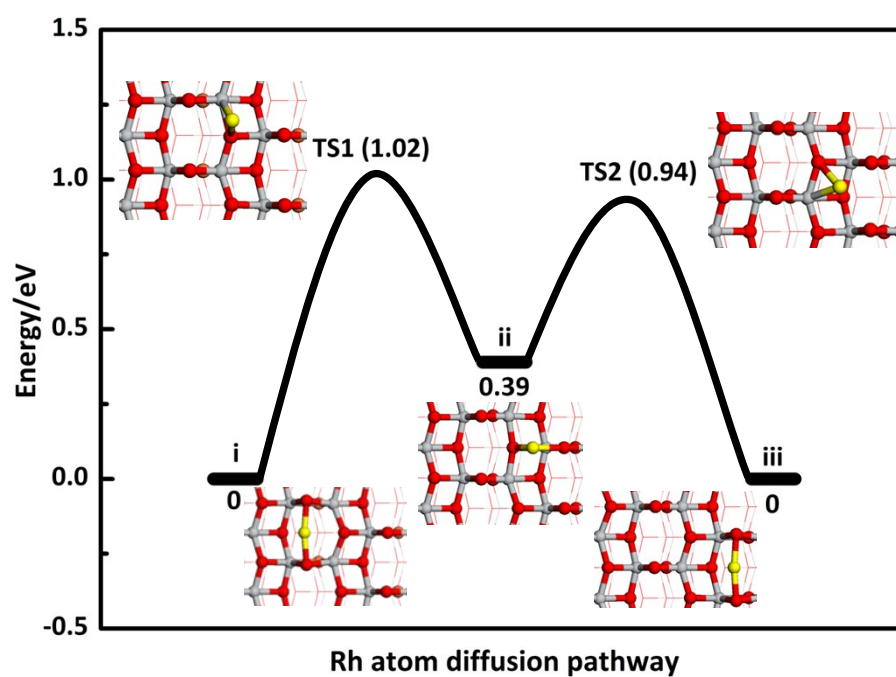

**Figure S1** The diffusion pathway of Rh atom from #1 adsorption configuration to #2 adsorption configuration.

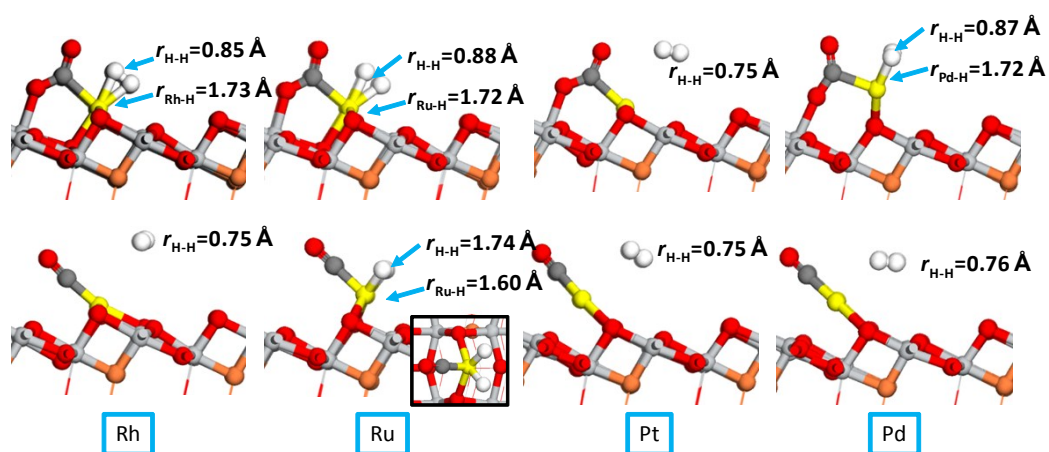

**Figure S2** The adsorption structures of  $\text{CO}_2$ , CO, the co-adsorbed  $\text{CO-H}_2$  and  $\text{CO}_2\text{-H}_2$  on  $\text{M}_1/\text{TiO}_2$

(M: Rh, Ru, Pd and Pt).

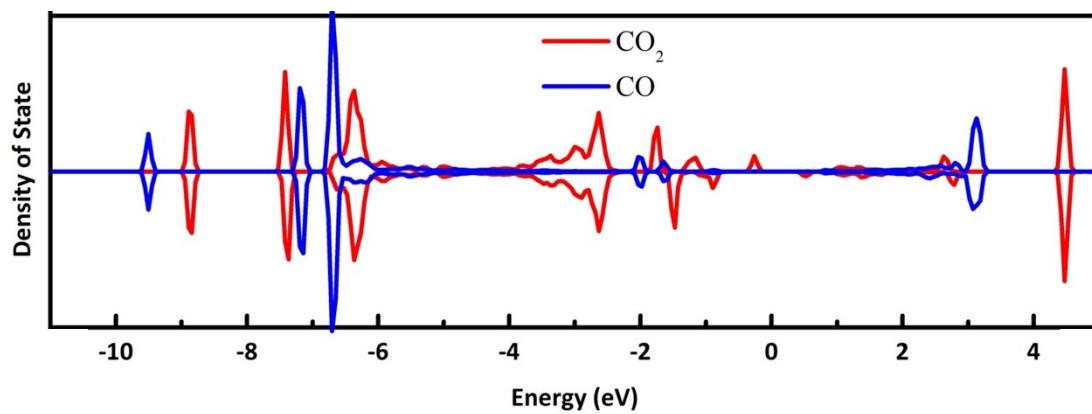

**Figure S3** The DOS of CO<sub>2</sub> and CO for CO<sub>2</sub>-Rh<sub>1</sub>/TiO<sub>2</sub> (red line) and CO-Rh<sub>1</sub>/TiO<sub>2</sub> (blue line) system.

**Table S1** The activation barriers and reaction energies of elementary steps from the three reaction pathways of RWGS on Rh<sub>1</sub>/TiO<sub>2</sub>. \* and ^ represent the different adsorption sites. O<sub>v</sub> represents the surface oxygen vacancy.

|           | Elementary steps                                                | Reaction barriers/eV | Reaction energies/eV |
|-----------|-----------------------------------------------------------------|----------------------|----------------------|
| Pathway 1 | $CO_2 + H_2 + 2 * \rightarrow * CO_2 + * H_2$                   | 0                    | -0.77                |
|           | $* CO_2 + * H_2 \rightarrow * COOH + * H$                       | 0.24                 | -0.71                |
|           | $* COOH + * H \rightarrow * CO + H_2O + *$                      | 1.92                 | 0.66                 |
|           | $* CO \rightarrow CO + *$                                       | 0                    | 1.48                 |
| Pathway 2 | $H_2 + * \rightarrow * H_2$                                     | 0                    | -0.58                |
|           | $* H_2 + ^\wedge \rightarrow * H + ^\wedge H$                   | 0.80                 | -0.22                |
|           | $CO_2 + * \rightarrow * CO_2$                                   | 0                    | -0.43                |
|           | $* CO_2 + * H \rightarrow * COOH + *$                           | 0.81                 | 0                    |
|           | $^\wedge H + * \rightarrow * H + ^\wedge$                       | 1.10                 | -0.25                |
|           | $* COOH + * H \rightarrow * CO + H_2O + *$                      | 1.92                 | 0.66                 |
| Pathway 3 | $* CO \rightarrow CO + *$                                       | 0                    | 1.48                 |
|           | $H_2 + * \rightarrow * H_2$                                     | 0                    | -0.58                |
|           | $* H_2 + ^\wedge \rightarrow * H + ^\wedge H$                   | 0.80                 | -0.22                |
|           | $* H + ^\wedge H + O_{surf} \rightarrow * + ^\wedge H_2O + O_v$ | 1.83                 | 0.90                 |
|           | $^\wedge H_2O \rightarrow ^\wedge + H_2O$                       | 0                    | 0.64                 |
|           | $CO_2 + ^\wedge \rightarrow ^\wedge CO_2$                       | 0                    | -0.68                |
|           | $^\wedge CO_2 + O_v + * \rightarrow * CO + O_{surf} + ^\wedge$  | 0                    | -0.82                |
|           | $* CO \rightarrow CO + *$                                       | 0                    | 1.48                 |
